# Supplementary material
Source: PubMed Central journal article supplement (PMC6425983)
Supplement: Supp_Fig1.pdf [file Supp_Fig1.pdf]

## Supplementary Data

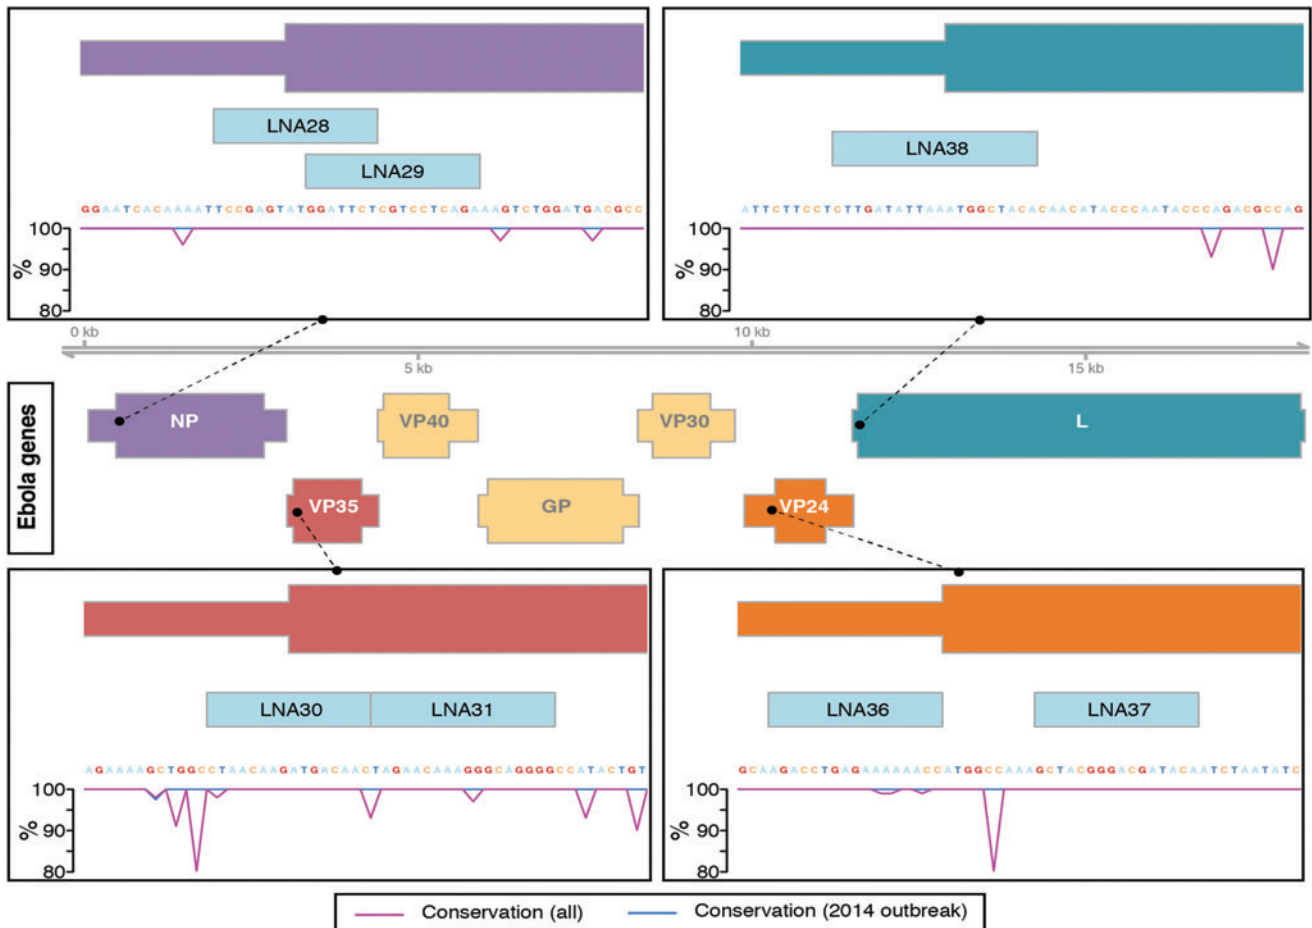

**SUPPLEMENTARY FIG. S1.** Binding sites of LNA ASO mixmers targeting Ebola transcripts. Diagram showing the coding regions of the Ebola virus. A detailed view of the regions surrounding transcriptional start sites of targeted virus transcripts and binding sites of the LNA ASOs are shown in the *panels*. LNA, locked nucleic acid; ASO, antisense oligonucleotide.
