# Supplementary material
Source: PubMed Central journal article supplement (PMC6425983)
Supplement: Supp_Fig2.pdf [file Supp_Fig2.pdf]

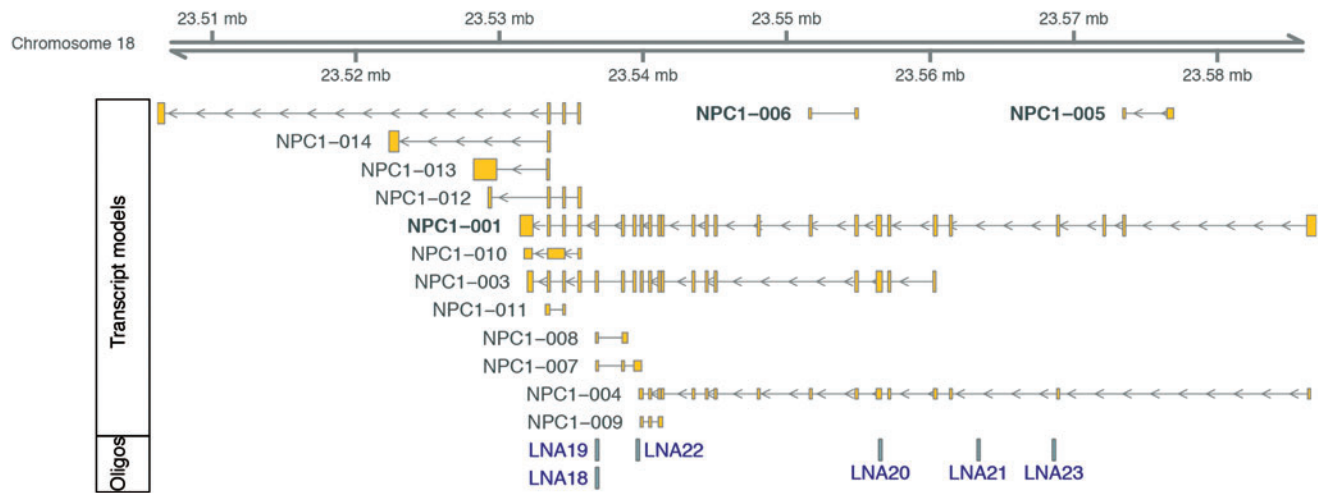

**SUPPLEMENTARY FIG. S2.** Binding sites of LNA gapmer ASOs targeting the human *NPC1* transcript. Diagram showing a genomic view of the *NPC1* gene region. The binding sites of LNA ASOs targeting *NPC1* are shown. NPC1, Niemann-Pick C1.
