# Supplementary material
Source: PubMed Central journal article supplement (PMC6425983)
Supplement: Supp_Fig3.pdf [file Supp_Fig3.pdf]

### Optimizing DNA template concentrations for *in vitro* reactions

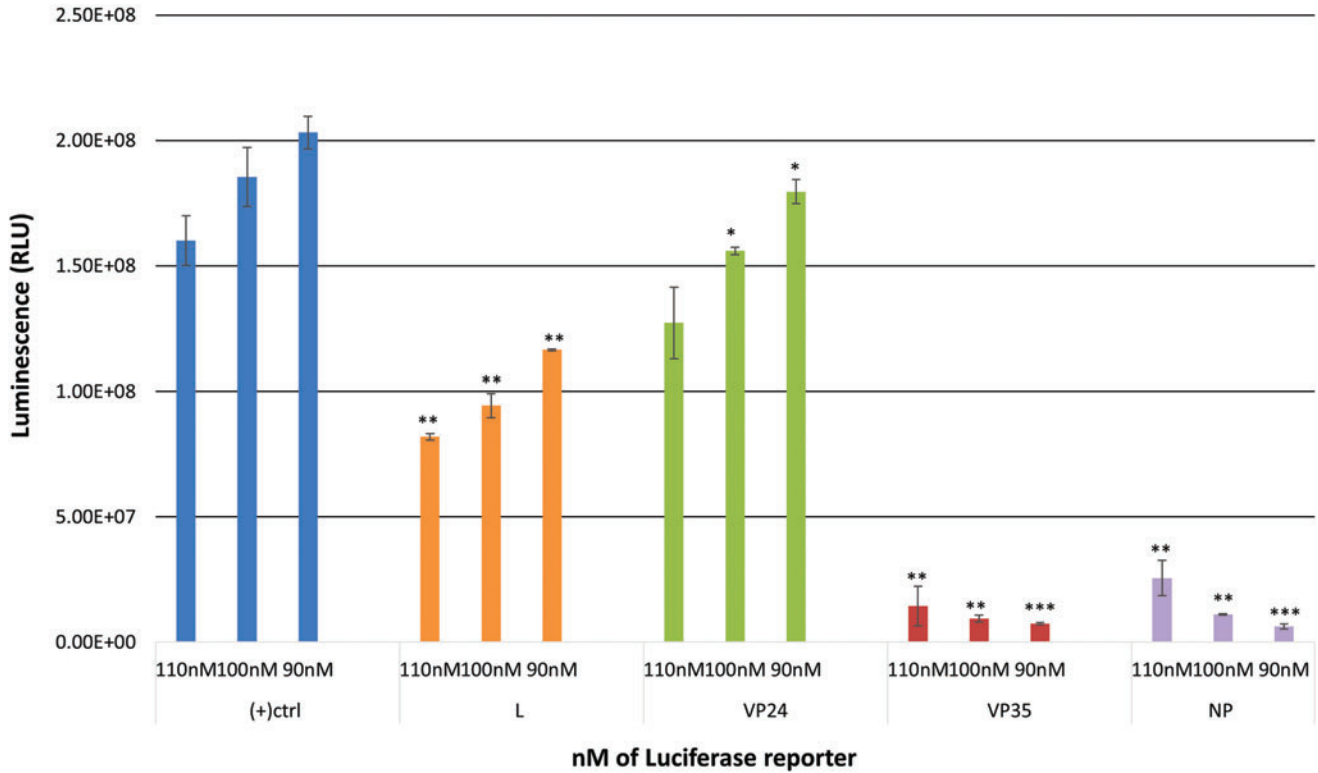

**SUPPLEMENTARY FIG. S3.** Optimization of concentration of Ebola luciferase reporters for *in vitro* assays. The optimal DNA template concentration for Ebola luciferase reporters was determined by dose titration to avoid variability in gene expression. About 90 nM of DNA template was determined to be optimal for consistent reproducibility across all vectors due to lowest range of error. \* $P < 0.05$ , \*\* $P < 0.01$ , \*\*\* $P < 0.001$ .
