# Supplementary material
Source: PubMed Central journal article supplement (PMC6425983)
Supplement: Supp_Fig5.pdf [file Supp_Fig5.pdf]

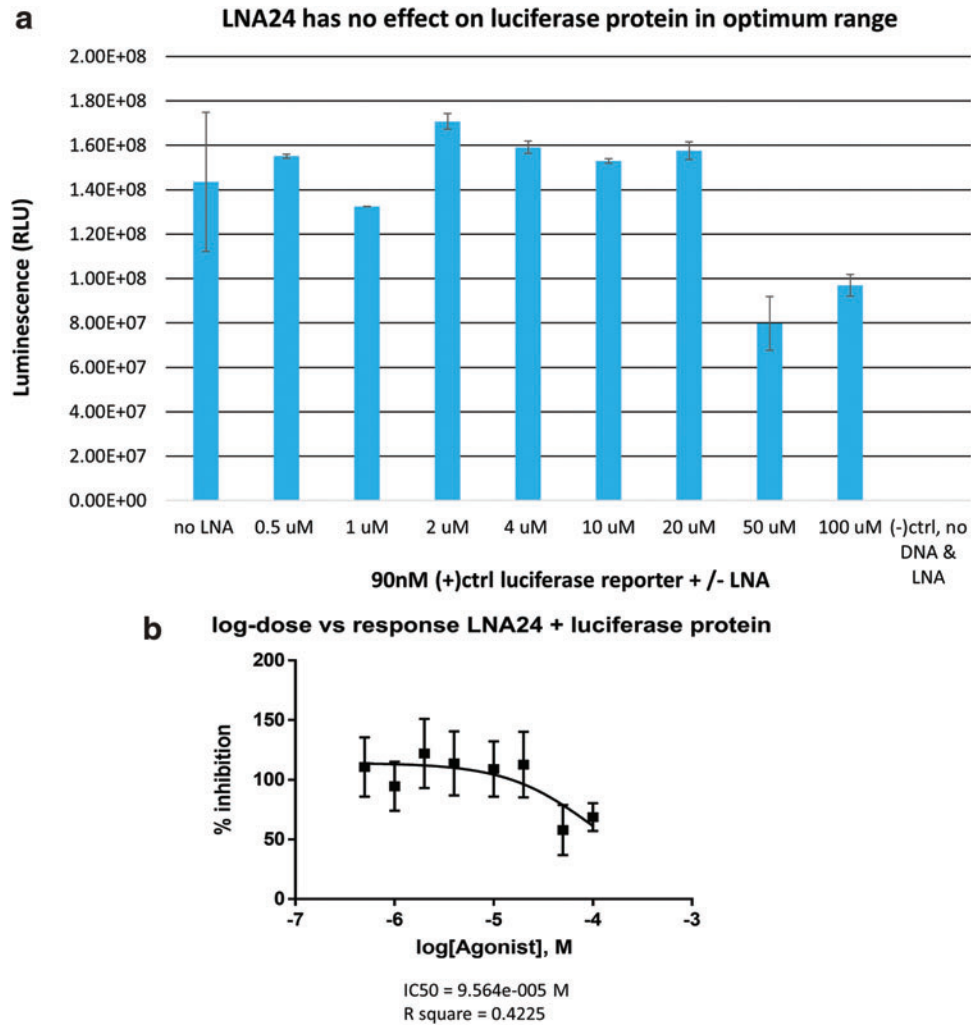

**SUPPLEMENTARY FIG. S5.** The negative control LNA ASO, LNA24, displays no reduction of Ebola target proteins or luciferase gene at concentrations by which LNA ASOs specifically inhibit Ebola reporters. **(a)** To narrow the range in which LNA ASOs can stochastically knockdown proteins in our *in vitro* system, LNA24, the negative control, was tested with the empty luciferase gene reporter containing a functional ATG (nonmutated). The optimal range was determined to be between 0.5 and 10  $\mu$ M of LNA ASOs. >50% reduction until 50  $\mu$ M of LNA24 ASO. **(b)** IC50 was calculated for dose-dependent effects of LNA24 ASOs. All points are in reference to no treatment (set at 100%). % Inhibition remained largely stable until 50  $\mu$ M; IC50 was determined to be 95  $\mu$ M.
