# Supplementary material
Source: PubMed Central journal article supplement (PMC6425983)
Supplement: Supp_Fig6.pdf [file Supp_Fig6.pdf]

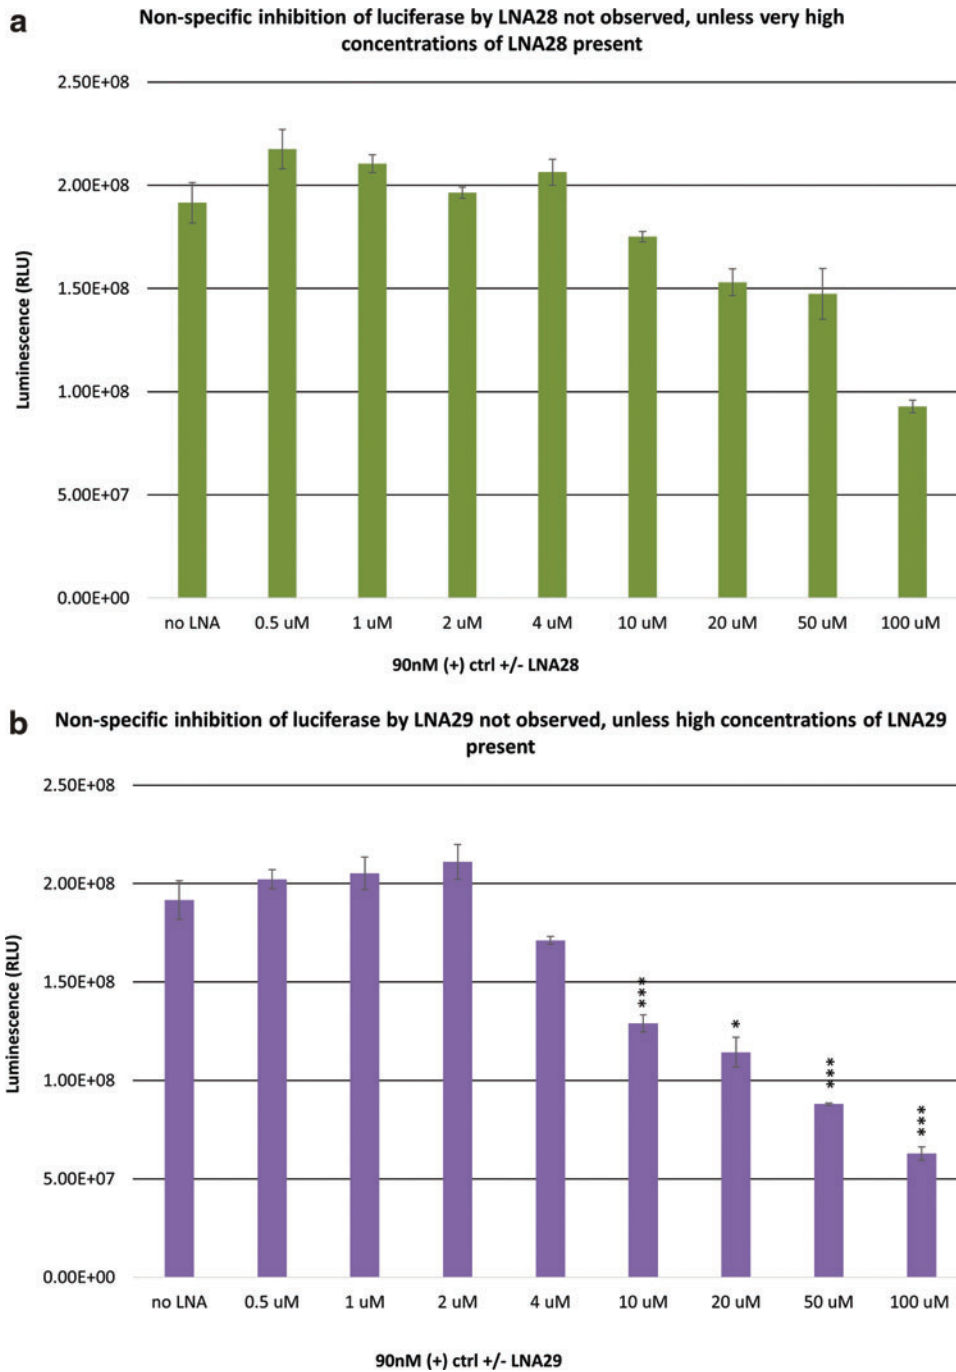

**SUPPLEMENTARY FIG. S6.** Assessment of specificity of LNA ASOs targeting NP. The range for LNA ASOs specificity (0.5–10  $\mu$ M) was additionally demonstrated by testing LNA ASOs targeting NP protein (LNA28 and LNA29) with the empty luciferase reporter. **(a)** Nonspecific inhibition of luciferase by LNA28 was only observed at >20  $\mu$ M LNA28. **(b)** Nonspecific inhibition of luciferase by LNA29 does not occur until 10  $\mu$ M of LNA ASO. Hence, knockdown within the 0.5–10  $\mu$ M range was considered target specific. **(c, d)** IC<sub>50</sub> values were calculated for dose-dependent effects of LNA ASOs. All points are in reference to no treatment (set at 100%). For some points, the error bars would be shorter than the height of the symbol. In these cases, the error bars are not shown/visible. IC<sub>50</sub> for LNA28 ASO was calculated to be 45  $\mu$ M. IC<sub>50</sub> for ASO LNA29 was calculated to be 11  $\mu$ M. \* $P$  < 0.05, \*\* $P$  < 0.01, \*\*\* $P$  < 0.001.

**c** log-dose vs response LNA28+ luciferase

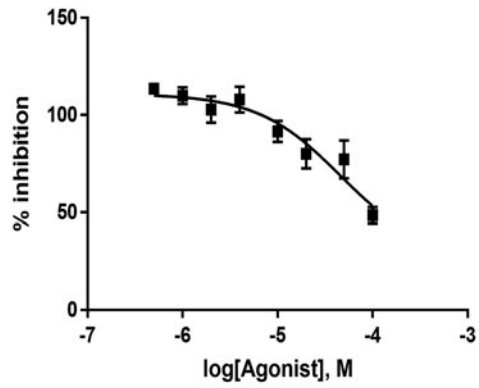

IC50 = 4.549e-005 M  
R square = 0.8816

**d** log-dose vs response LNA29 + luciferase

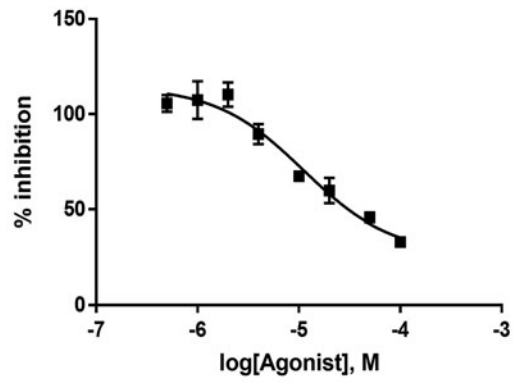

IC50 = 1.111e-005 M  
R square = 0.9502

SUPPLEMENTARY FIG. S6. (Continued).
