# Supplementary material
Source: PubMed Central journal article supplement (PMC6425983)
Supplement: Supp_Fig7.pdf [file Supp_Fig7.pdf]

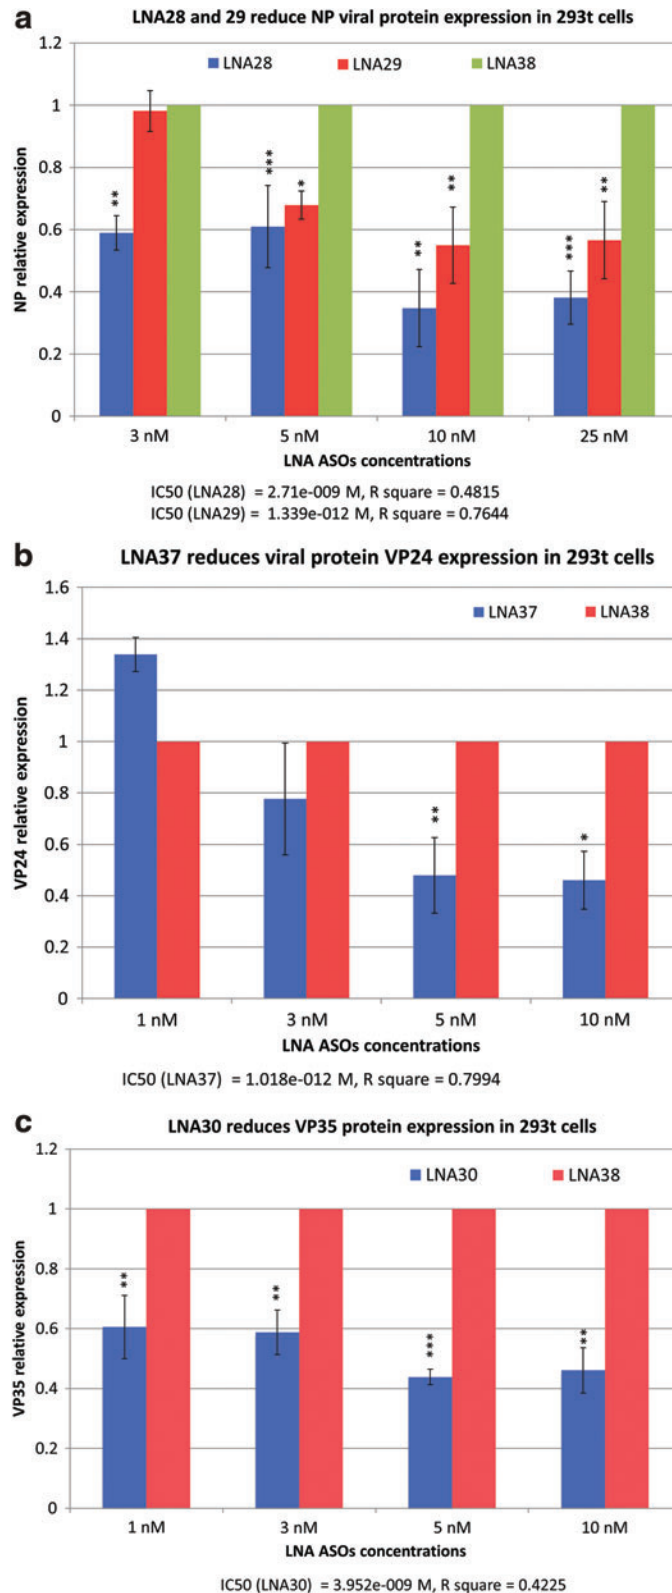

**SUPPLEMENTARY FIG. S7.** LNA ASOs reduced Ebola protein expression in HEK293T cells. LNA ASOs were tested in HEK293T cells to determine optimum range for specific inhibition of Ebola proteins in a cellular assay. LNA38 targeting the L protein was used as a negative control here. **(a)** LNA28 significantly reduces Ebola NP-luciferase fusion protein in HEK293T cells beginning at 3 nM. LNA29 significantly reduces Ebola NP-luciferase fusion protein in HEK293T cells beginning at 5 nM and protein reduction levels off at 10 nM. **(b)** LNA37 significantly reduces target Ebola VP24-luciferase fusion protein in HEK293T cells at 5 nM. **(c)** LNA30 significantly reduces target Ebola VP35-luciferase fusion protein in HEK293T cells at 1 nM. Overall, LNA ASOs were most effective at inhibiting Ebola protein expression in the 3–10 nM concentration range. IC50 values were calculated for all LNA ASOs tested and are provided. \* $P < 0.05$ , \*\* $P < 0.01$ , \*\*\* $P < 0.001$ .
