# Supplementary material
Source: PubMed Central journal article supplement (PMC6425983)
Supplement: Supp_Fig8.pdf [file Supp_Fig8.pdf]

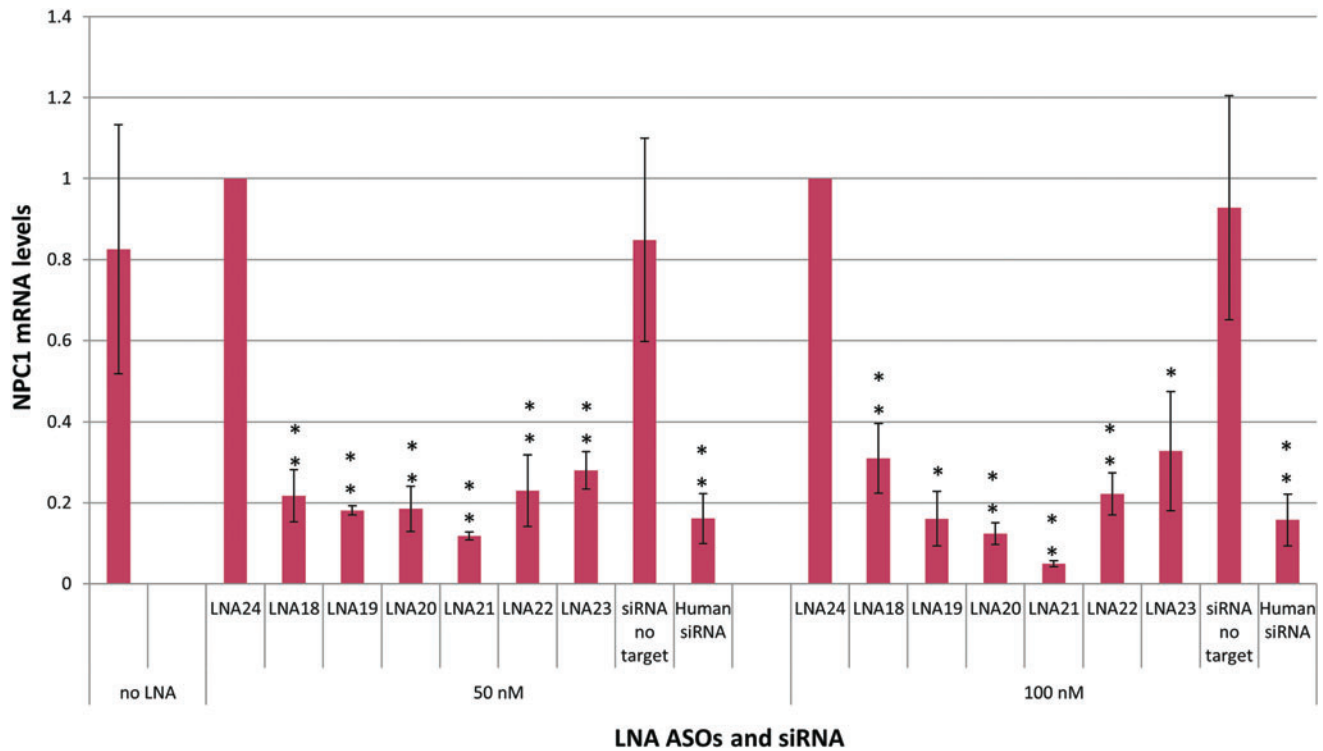

**SUPPLEMENTARY FIG. S8.** LNA ASOs targeting NPC1 reduce *NPC1* mRNA levels in HepG2 cells. Six LNA ASOs targeting NPC1, a negative control LNA ASO (LNA24), and siRNAs were transfected into HepG2 cells and *NPC1* mRNA levels measured by quantitative reverse transcription-polymerase chain reaction (qRT-PCR) after 48 h to screen for most effective LNA ASOs. LNA ASOs were tested at two concentrations: 50 and 100 nM. siRNA targeting *NPC1* was included as positive control, and nontargeting siRNA was used as negative control. LNA20, LNA21, and LNA22 demonstrated greatest reduction in *NPC1* mRNA levels. \* $P < 0.05$ , \*\* $P < 0.01$ , \*\*\* $P < 0.001$ .
