# Supplementary material
Source: PubMed Central journal article supplement (PMC6425983)
Supplement: Supp_Fig10.pdf [file Supp_Fig10.pdf]

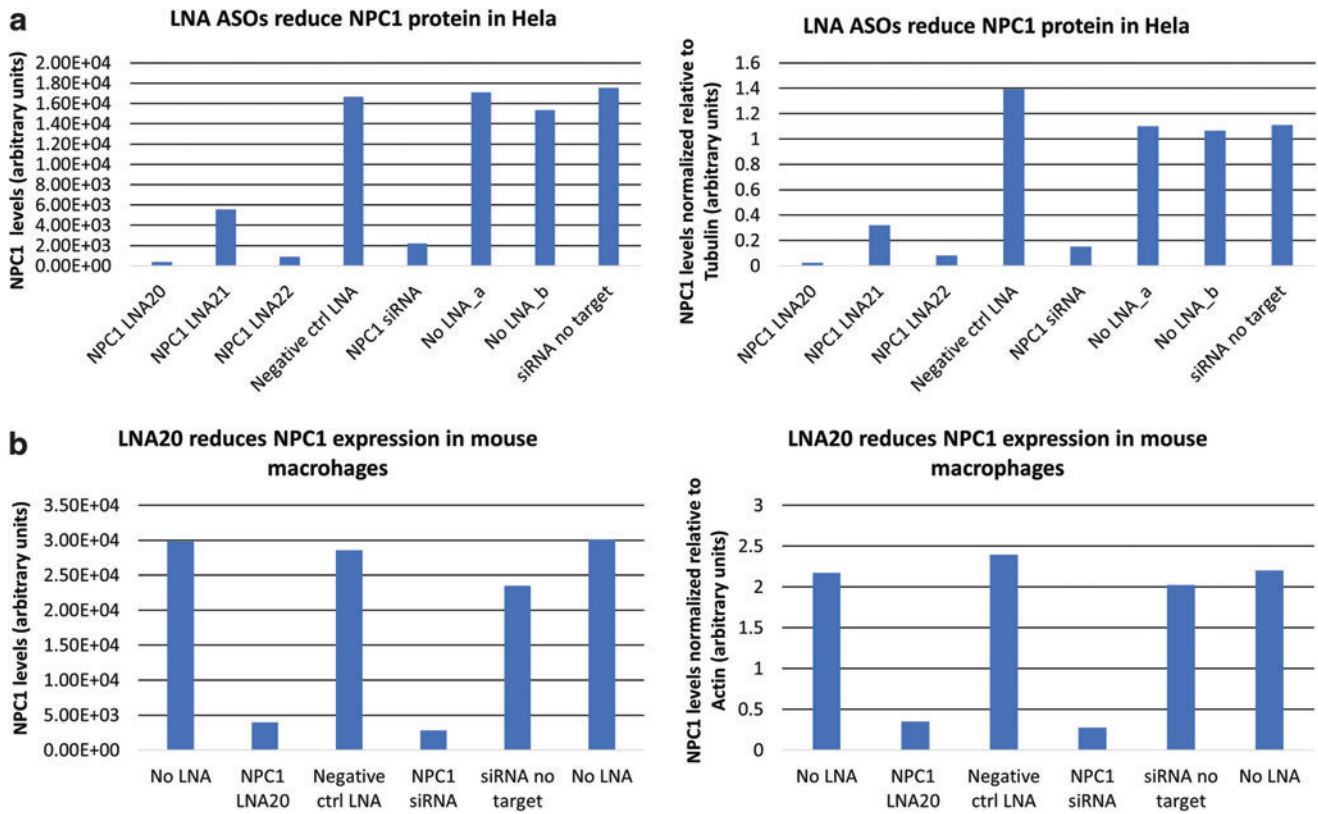

**SUPPLEMENTARY FIG. S10.** LNA ASOs targeting NPC1 reduce NPC1 protein levels in HeLa cells and mouse macrophages. NPC1 knockdown data provided in Fig. 3b, d were quantified. Densitometry data are provided in two formats: NPC1 levels independent of the loading controls; and NPC1 levels normalized or relative to the loading controls (tubulin and actin). Densitometry data show that *siRNA no target* and *no LNA control* do not appear to be significantly different. **(a)** In HeLa cells, LNA20 depletes NPC1 protein to a greater extent than siRNA. **(b)** In mouse macrophages, LNA20 and siRNA appear to reduce Npc1 protein to a similar degree.
